# Supplementary material
Source: Springer Nature journal article supplement (https://www.springermedizin.de/resource/supplementary/13012_2010_456_MOESM3_ESM.pdf/9629724)
Supplement: MOESM3 [file 9629724]

## Enabling factors

- Existence of guidelines
- Existence of Health Management Information System
- CHMT support
- Existence of committees & boards
- Perceived need of stakeholders
- Presence of REACT focal person
- Collaboration with researchers

## Mechanism of change

Relevance

## Constraining factors

- Inactive structures
- Limited resources
- Low level of public awareness
- Budget ceilings & guidelines
- Unreliable & untimely funding
- CHMT doubt users' capacity
- Interference from higher authorities
